# Supplementary material for: A first-principles and machine-learning investigation on the electronic, photocatalytic, mechanical and heat conduction properties of nanoporous C5N monolayers
Source: Royal Society of Chemistry journal article supplement (doi:10.1039/d1nr06449e), 2022-01-01
Supplement: d1nr06449e1.pdf [file d1nr06449e1.pdf]

## Supplementary information

# A first-principles and machine-learning investigation on the electronic, photocatalytic, mechanical and heat conduction properties of nanoporous C<sub>5</sub>N monolayer

Bohayra Mortazavi\*<sup>a,b</sup>, Masoud Shahrokhi<sup>c</sup>, Fazel Shojaei<sup>d</sup>, Timon Rabczuk<sup>e</sup>, and Xiaoying Zhuang<sup>a,e</sup>,  
Alexander V. Shapeev<sup>f</sup>

<sup>a</sup>*Chair of Computational Science and Simulation Technology, Department of Mathematics and Physics, Leibniz Universität Hannover, Appelstraße 11, 30167 Hannover, Germany.*

<sup>b</sup>*Cluster of Excellence PhoenixD (Photonics, Optics, and Engineering–Innovation Across Disciplines), Gottfried Wilhelm Leibniz Universität Hannover, Hannover, Germany.*

<sup>c</sup>*Young Researchers Club, Kermanshah Branch, Islamic Azad University, Kermanshah, Iran.*

<sup>d</sup>*Department of Chemistry, Faculty of Nano and Bioscience and Technology, Persian Gulf University, Bushehr 75169, Iran.*

<sup>e</sup>*College of Civil Engineering, Department of Geotechnical Engineering, Tongji University, 1239 Siping Road Shanghai, China*

<sup>f</sup>*Skolkovo Institute of Science and Technology, Skolkovo Innovation Center, Bolshoy Bulvar, 30, Moscow, 143026, Russia.*

Corresponding author: \*bohayra.mortazavi@gmail.com

## Atomic lattices in VASP POSCAR format.

```
1.0000000000000000
 20.9211667116195095  0.0000000000000000  0.0000000000000000
-10.4605833558097494 18.1182618490985199  0.0000000000000000
 0.0000000000000000  0.0000000000000000 20.0000000000000000
C N H
60 12 18
Direct
0.6055073677197925 0.7955003265328341 0.5000000000000000
0.5379677705093580 0.7946007073059056 0.5000000000000000
0.4681773482828471 0.7250684492966109 0.5000000000000000
0.4047398033629148 0.5983444761906379 0.5000000000000000
0.6054714622956562 0.5318634264275672 0.5000000000000000
0.4047573830119411 0.5282732335285265 0.5000000000000000
0.3995812194375083 0.7946255724020842 0.5000000000000000
0.3998468438762787 0.7250739288359049 0.5000000000000000
0.6722140887320195 0.9289300745205085 0.5000000000000000
0.6055578199262220 0.9298059707975275 0.5000000000000000
0.6052730510062397 0.9993384370520257 0.5000000000000000
0.3996085869215930 0.9289071040021820 0.5000000000000000
0.4671559900256017 0.9298028360231844 0.5000000000000000
0.5369424683226871 0.9993493129416532 0.5000000000000000
0.6720199066411343 0.8622240879416191 0.5000000000000000
0.5371615159624682 0.8622156753617636 0.5000000000000000
0.6719948966559812 0.5316829223843965 0.5000000000000000
0.4680137055618549 0.8622158431839239 0.5000000000000000
0.3329406692113510 0.2592978745636921 0.5000000000000000
0.3365296586149064 0.4600424153321503 0.5000000000000000
0.0700570715557464 0.4650177125591526 0.5000000000000000
0.1396393470464924 0.4648346394504804 0.5000000000000000
0.0691993263779020 0.2591419947313576 0.5000000000000000
0.0701071773379504 0.3266878448080026 0.5000000000000000
0.1396598029862630 0.3965074719651481 0.5000000000000000
0.2664216114669223 0.4600104380064403 0.5000000000000000
0.3331346872410154 0.1927868337191119 0.5000000000000000
0.0024695756574669 0.3965986894048139 0.5000000000000000
0.0024870376351934 0.1926262877038724 0.5000000000000000
0.0024867838350833 0.3274742060304575 0.5000000000000000
0.3995802832156605 0.3268320796880498 0.5000000000000000
0.3998373548622326 0.3966310108578039 0.5000000000000000
0.5379609258524198 0.4652050121068081 0.5000000000000000
0.4681698521351070 0.4649486615753483 0.5000000000000000
0.3996418274141710 0.1925887562951796 0.5000000000000000
0.4671750132493775 0.2592410542344897 0.5000000000000000
0.5369701708394048 0.2595087505813533 0.5000000000000000
0.6003385140584035 0.1961536537032149 0.5000000000000000
0.6685352240067642 0.1260503292249555 0.5000000000000000
0.9357483237965456 0.4649608168992601 0.5000000000000000
0.9348800206736135 0.3974412630775853 0.5000000000000000
0.8653454694084985 0.3276642057157916 0.5000000000000000
0.7386392474868374 0.2643157436196998 0.5000000000000000
0.6722151231702145 0.4651856228780848 0.5000000000000000
```

0.6055864414531289 0.3976420921245560 0.5000000000000000  
0.6053124014304089 0.3278280063480445 0.5000000000000000  
0.6685772722762432 0.2643596074544602 0.5000000000000000  
0.9357757737728241 0.1924245199600818 0.5000000000000000  
0.9348840617499542 0.2590596181400866 0.5000000000000000  
0.8653510915194019 0.2593333444383342 0.5000000000000000  
0.7386250608924946 0.1960852247249009 0.5000000000000000  
0.6003146194315618 0.1260618019838590 0.5000000000000000  
0.4680012183755194 0.3276611544444557 0.5000000000000000  
0.5371558585786760 0.3967928602150257 0.5000000000000000  
0.0691259794045231 0.5316352042380296 0.5000000000000000  
0.2663937086139824 0.5282299080896453 0.5000000000000000  
0.3329234302845114 0.7955029190028796 0.5000000000000000  
0.3364872882107864 0.5983267584481753 0.5000000000000000  
0.0024409349124778 0.5314750117658580 0.5000000000000000  
0.3330892552478575 0.8621994836683594 0.5000000000000000  
0.4693072534992484 0.6616317782752059 0.5000000000000000  
0.3352491352837970 0.6616369310761090 0.5000000000000000  
0.2030632663284375 0.5294412399812732 0.5000000000000000  
0.2031324598981150 0.3954244916442570 0.5000000000000000  
0.3352571112606467 0.3954826674476911 0.5000000000000000  
0.4693163640273245 0.5295324871165475 0.5000000000000000  
0.5357917561282203 0.1949150229184665 0.5000000000000000  
0.6698323272468127 0.0627738189543920 0.5000000000000000  
0.8019401441114368 0.3288567098824590 0.5000000000000000  
0.6698798199913443 0.3289429383471270 0.5000000000000000  
0.8019010001259197 0.1947742504171695 0.5000000000000000  
0.5357648296404095 0.0627635987022309 0.5000000000000000  
0.6040784254103843 0.5832453518489750 0.5000000000000000  
0.4009822390156131 0.9816786068276114 0.5000000000000000  
0.7241270693906456 0.5838395719021928 0.5000000000000000  
0.2815338022107294 0.2606517954459151 0.5000000000000000  
0.2809834700241214 0.1406453221526582 0.5000000000000000  
0.4009956453821094 0.1411828538522298 0.5000000000000000  
0.8829801636662916 0.4635874626116539 0.5000000000000000  
0.7236241722322965 0.4638467829702636 0.5000000000000000  
0.1218858462331683 0.5830470776883786 0.5000000000000000  
0.2815343038372806 0.7427383883282388 0.5000000000000000  
0.0024585659381231 0.5836287161698663 0.5000000000000000  
0.2809473816360425 0.8621990829502990 0.5000000000000000  
0.0024884351758921 0.1404827963910864 0.5000000000000000  
0.8830154655526087 0.1410221812638559 0.5000000000000000  
0.1219548941677279 0.2604843305026768 0.5000000000000000  
0.6041518607142259 0.7427411648287386 0.5000000000000000  
0.7241574770746259 0.8622146250799744 0.5000000000000000  
0.7236194912543235 0.9816845459146100 0.5000000000000000

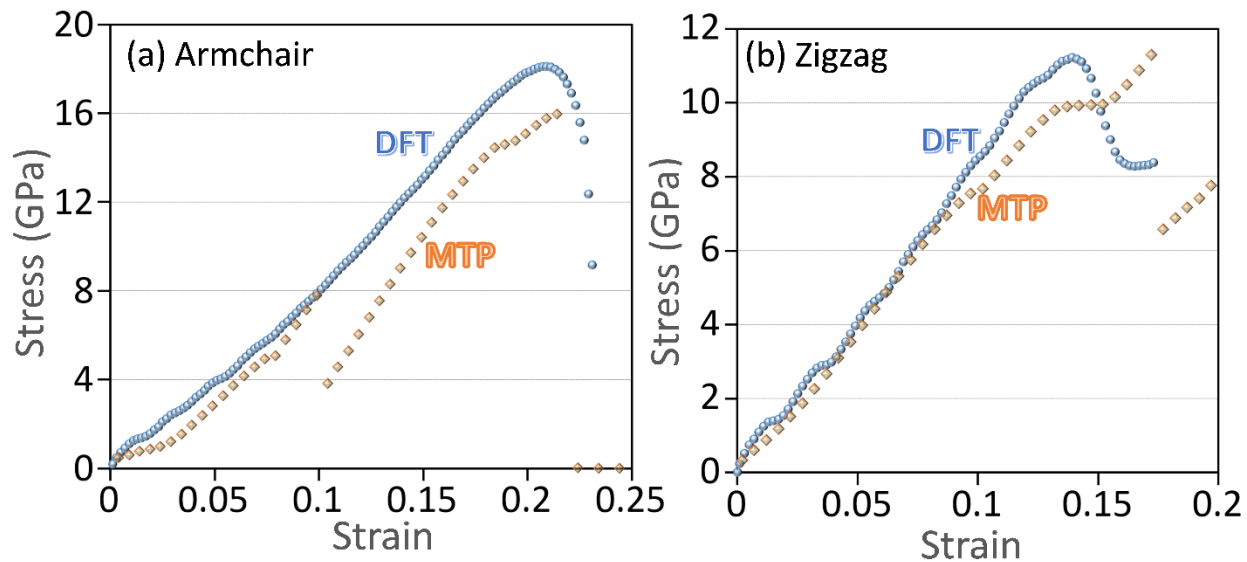

**Fig. S1**, Uniaxial stress-strain relations of the C<sub>5</sub>N monolayer elongated along the (a) armchair and (b) zigzag directions by DFT and MTP-based CMD without taking into account the van der Waals (vdW) dispersion correction in the development of the MTP.

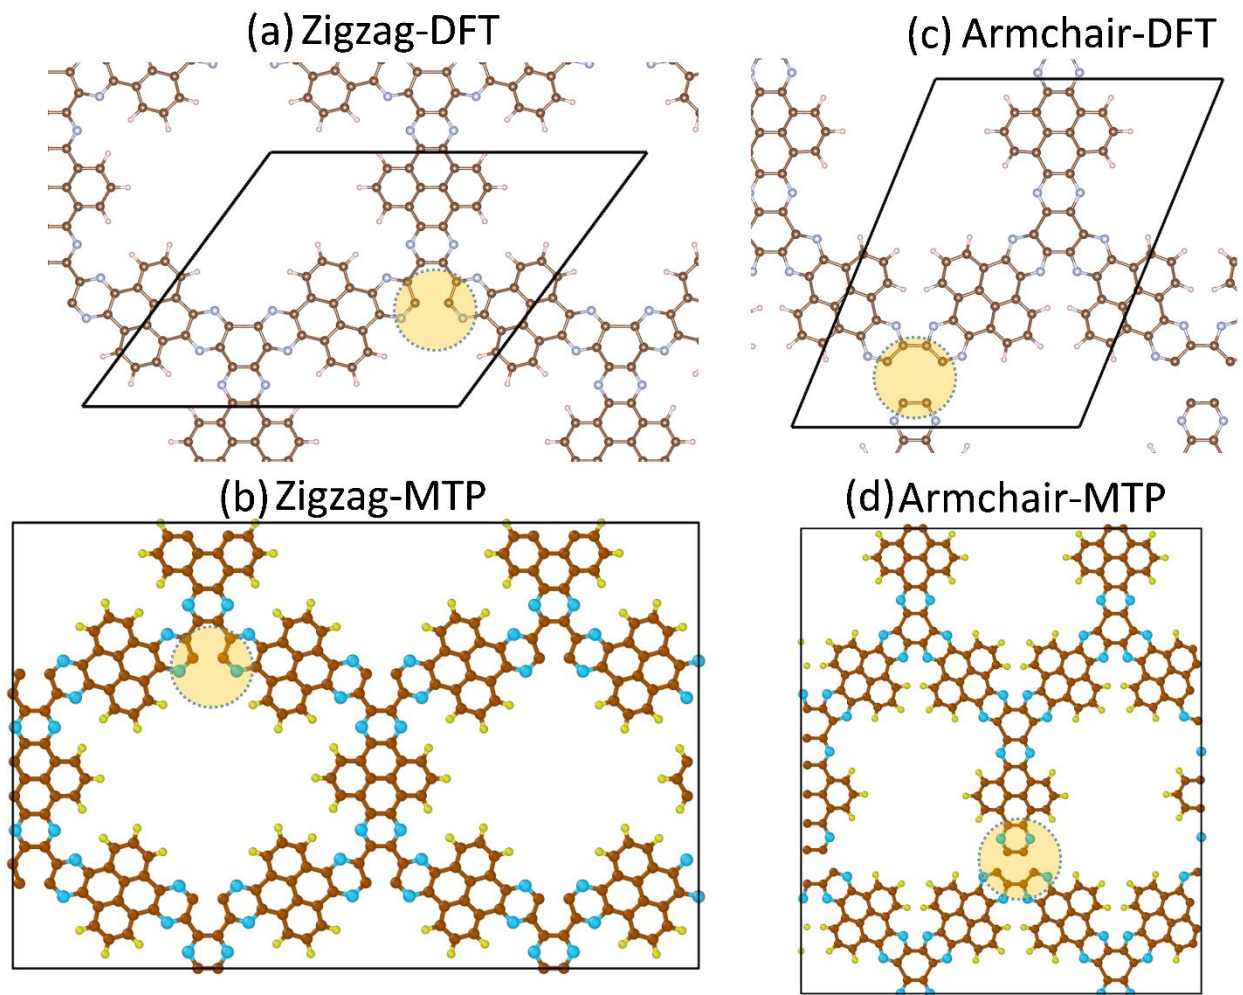

**Fig. S2**, Failure mechanism of the  $C_5N$  monolayer predicted by DFT and MTP-based CMD models without taking into account the vdW dispersion correction in the development of the MTP. The circles highlight the region that the bond breakages occur.
